# Supplementary material for: Dietary Cadmium Exposure and Risk of Breast, Endometrial, and Ovarian Cancer in the Women’s Health Initiative
Source: PubMed Central journal article supplement (PMC4050510; doi:10.1289/ehp.1307054), 2014-03-14
Supplement: ehp.1307054.s001.pdf [file ehp.1307054.s001.pdf]

**Supplemental Material**

**Dietary Cadmium Exposure and Risk of Breast, Endometrial, and  
Ovarian Cancer in the Women's Health Initiative**

Scott V. Adams, Sabah M. Quraishi, Martin M. Shafer, Michael N. Passarelli, Emily P. Freney, Rowan T. Chlebowski, Juhua Luo, Jaymie R. Meliker, Lina Mu, Marian L. Neuhouser, and Polly A. Newcomb

**Table S1.** Adjusted hazard ratio (HR) and 95% confidence intervals (95% CI) for breast, endometrial, and ovarian cancer associated with dietary cadmium exposure, without adjustment for total energy intake.

| Outcome and Exposure      | N       | Cases | Model 1 HR<br>(95% CI) | P-trend | Model 2<br>HR (95% CI) | P-trend           | Model 3 HR<br>(95% CI) | P-trend           |
|---------------------------|---------|-------|------------------------|---------|------------------------|-------------------|------------------------|-------------------|
| <b>Breast Cancer</b>      | 150,889 | 6,658 |                        |         |                        |                   |                        |                   |
| Quintile dietary cadmium  |         |       |                        |         |                        |                   |                        |                   |
| 1                         | 30,171  | 1,198 | Ref.                   |         | Ref.                   |                   | Ref.                   |                   |
| 2                         | 30,185  | 1,378 | 1.12 (1.04, 1.21)      |         | 1.07 (0.99, 1.16)      |                   | 1.07 (0.98, 1.16)      |                   |
| 3                         | 30,132  | 1,338 | 1.08 (0.99, 1.16)      |         | 1.01 (0.94, 1.10)      |                   | 0.99 (0.90, 1.09)      |                   |
| 4                         | 30,202  | 1,416 | 1.13 (1.05, 1.22)      |         | 1.06 (0.98, 1.14)      |                   | 1.03 (0.92, 1.14)      |                   |
| 5                         | 30,199  | 1,328 | 1.07 (0.99, 1.16)      | 0.09    | 1.00 (0.92, 1.08)      | 0.72 <sup>a</sup> | 0.96 (0.85, 1.09)      | 0.39 <sup>a</sup> |
| <b>Endometrial Cancer</b> | 91,643  | 1,198 |                        |         |                        |                   |                        |                   |
| Quintile dietary cadmium  |         |       |                        |         |                        |                   |                        |                   |
| 1                         | 17,589  | 193   | Ref.                   |         | Ref.                   |                   | Ref.                   |                   |
| 2                         | 18,257  | 247   | 1.20 (0.99, 1.45)      |         | 1.15 (0.95, 1.39)      |                   | 1.12 (0.91, 1.38)      |                   |
| 3                         | 18,423  | 231   | 1.10 (0.91, 1.33)      |         | 1.03 (0.85, 1.25)      |                   | 1.00 (0.78, 1.27)      |                   |
| 4                         | 18,747  | 238   | 1.12 (0.92, 1.35)      |         | 1.02 (0.84, 1.24)      |                   | 1.00 (0.76, 1.30)      |                   |
| 5                         | 18,627  | 289   | 1.39 (1.15, 1.66)      | 0.005   | 1.25 (1.03, 1.50)      | 0.12              | 1.25 (0.92, 1.70)      | 0.40              |
| <b>Ovarian Cancer</b>     | 125,569 | 735   |                        |         |                        |                   |                        |                   |
| Quintile dietary cadmium  |         |       |                        |         |                        |                   |                        |                   |
| 1                         | 25,056  | 123   | Ref.                   |         | Ref.                   |                   | Ref.                   |                   |
| 2                         | 25,091  | 153   | 1.20 (0.95, 1.52)      |         | 1.17 (0.93, 1.50)      |                   | 1.10 (0.86, 1.42)      |                   |
| 3                         | 25,077  | 157   | 1.22 (0.96, 1.54)      |         | 1.17 (0.93, 1.49)      |                   | 1.04 (0.78, 1.39)      |                   |
| 4                         | 25,222  | 138   | 1.07 (0.84, 1.36)      |         | 1.02 (0.81, 1.32)      |                   | 0.85 (0.61, 1.18)      |                   |
| 5                         | 25,123  | 164   | 1.29 (1.02, 1.63)      | 0.15    | 1.23 (0.99, 1.59)      | 0.33              | 0.93 (0.64, 1.34)      | 0.30              |

Model 1: adjusted for age and study component (observational, clinical trial). Model 2: additional adjustment for body mass index, smoking, alcohol consumption, race/ethnicity, education, physical activity, age at first birth, age at menarche, age at menopause, unopposed E use, and E + P use. For breast cancer only: also adjusted for mammography 2 years prior to baseline. Model 3: additional adjustment for daily vegetable servings and daily grain servings.

P-trend: Wald test of ordinal variable for dietary cadmium.

<sup>a</sup>Inverse trend.
